# Supplementary material
Source: publisher figshare collection journal article supplement (https://karger.figshare.com/ndownloader/files/12784832)
Supplement: Supplementary file 1 [file 12784832]

**ProgStar-4 Study Team as of 26 Apr 2018**

*Required language to appear in the appropriate location of all publications using ProgStar (retrospective and prospective study) resources*

The ProgStar-4 study is supported by a contract from the Shulsky Foundation.

**Chair’s Office**

Hendrik P.N. Scholl, MD; MA

Mandeep Singh, MA

Rupert W. Strauss, MD

Yulia Wolfson, MD

Millena Bittencourt, MD

Syed Mahmood Shah, MD

Mohamed Ahmed, MD

Etienne Schönbach, MD

Millena Bittencourt, MD

Kaoru Fujinami, MD, PhD

**Moorfields Eye Hospital, London**

Michel Michaelides, MD

Simona Degli Esposti, MD

Anthony Moore

Andrew Webster, MD

Sophie Connor, BSc

Rupert W Strauss, MD

Jade Barnfield, BA

Zaid Salchi, MD

Clara Vasquez-Alfageme, MD

Victoria McCudden

Maria Pefkianaki, MD

Jonathan Aboshiha, MA, MB

Gerald Liew

Anthony Robson, PhD

Alexa King, BA

Daniela Ivanova Cajas Narvaez, MSc

Katy Barnard, BS

Catherine Grigg, BSc

Hannah Dunbar, PhD

Yetunde Obadeyi

Karine Girard-Claudon, MST

Hilary Swann, BSc

Avani Rughani, BSc

Charles Amoah, NVQ

Dominic Carrington

Kanom Bibi, BSc

Emerson Ting Co, DMD

Mohamed Nafaz Illiyas

Hamida Begum, BSc

Fiona Ellison, BSc, MSc

Sarah Hamburg, BSc

Selma Lewis, BSc

Racehl Murphy, BSc

Lauren Perkins, BSc

Amar Singh, BSc

Kaoru Fujinami, MD

Anthonay Robson, PhD

Andrew Carter, BSc

Anne Georgiou, PhD

Selma Lewism BSc

Saddaf Shaheen, PGDip, BSc

Harpreet Shinmar, MSc

Linda Burton, BSc

**Retina Foundation of the Southwest, Dallas**

David Birch, PhD

Yi-Zhong Wang, PhD

Luis Rodriguez, BS

Kirsten Locke, BS

Martin Klein, MS

Paulina Mejia, BS

**University of Tübingen, Tübingen**

Eberhart Zrenner, PhD

Fadi Nasser, MD

Gesa Astrid Hahn, MD

Barbara Wilhelm, MD

Tobias Peters, MD

Benjamin Beier, BSc

Lars Genedy

Matthias Deitermann

Regine Grund

Susanne Kramer, Dipl. Biol.

**Department of Ophthalmology, University of Bonn**

Peter Charbel Issa, MD, PhD

Philipp Hermann, MD

Philipp Müller, MD

Christina Küpper

Joanna Czauderna

Andrea Vollmann

**The Wilmer Eye Institute, Baltimore**

Hendrik P.N. Scholl, MD

Rupert W. Strauss, MD

Mandeep Singh, MD

Yulia Wolfson, MD

Syed Mahmood Shah, MD

Mohamed Ahmed, MD

Etienne Schönbach, MD

David G. Emmert, BA

Dennis Cain, CRA

Mark Herring, CRA

Jennifer Bassinger, COA

Lisa Liberto, COA

Saghar Bagheri, MD

**Dana Center Data Coordinating Center**

Sheila K. West, PhD

Ann-Margret Ervin, PhD

Beatriz Munoz, MS

Xiangrong Kong, PhD

Kurt Dreger, BS

Jennifer Jones, BA

Robert Burke, BA

**Wilmer Imaging Reading Center**

Mohamed I Ahmed, MD

Etienne Schönbach MD

Hemjot Kaur, MD

Jun Kong, MD, PhD
